# Supplementary material for: Optimization of Extended-Release ZL-004 Nanosuspensions for In Vivo Pharmacokinetic Study to Enhance Low Solubility and Compliance
Source: PubMed Central journal article supplement (PMC6337511; doi:10.3390/molecules24010007), 2018-12-20
Supplement: molecules-24-00007-s001.pdf [file molecules-24-00007-s001.pdf]

**Table S1.** The particle sizes of NS-H-1 $\alpha$  and NS-H $\alpha$ -2 during storage of 3 months at room temperature (Mean  $\pm$  SD,  $n=3$ ).

| Formulation      | Time (month) | Redispersity | D <sub>10</sub> (nm) | D <sub>50</sub> (nm) | D <sub>90</sub> (nm) |
|------------------|--------------|--------------|----------------------|----------------------|----------------------|
| NS-H $\alpha$ -2 | 0            | Yes          | 586 $\pm$ 17         | 1213 $\pm$ 81        | 2303 $\pm$ 58        |
|                  | 1            | Yes          | 595 $\pm$ 34         | 1178 $\pm$ 67        | 2496 $\pm$ 42        |
|                  | 3            | Yes          | 623 $\pm$ 35         | 1237 $\pm$ 90        | 2640 $\pm$ 63        |
| NS-H $\alpha$ -1 | 0            | Yes          | 569 $\pm$ 8          | 1150 $\pm$ 17        | 2761 $\pm$ 149       |
|                  | 1            | Yes          | 621 $\pm$ 47         | 1292 $\pm$ 42        | 2663 $\pm$ 138       |
|                  | 3            | No           | 893 $\pm$ 95         | 1506 $\pm$ 174       | 3149 $\pm$ 226       |

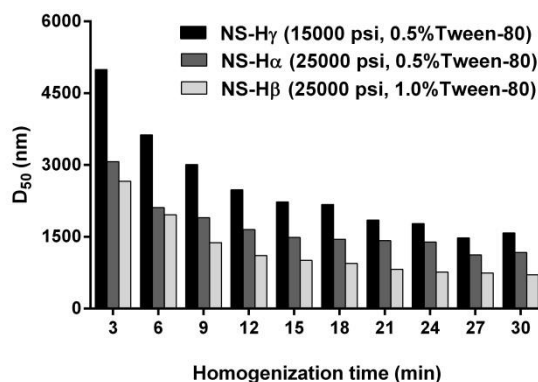

**Fig.S1.** Effect of homogenization time, pressure, and concentration of Tween-80 on the particle size.

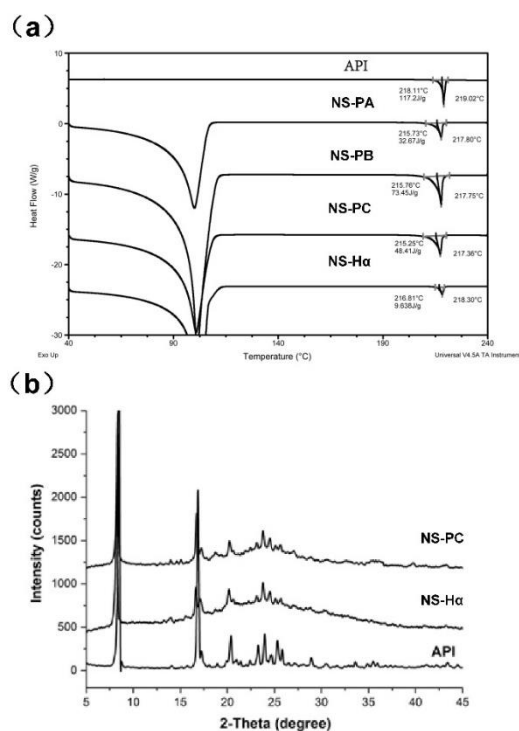

**Figure S2.** DSC curves of NS-PA, NS-PB, NS-PC, NS-H $\alpha$ , and API (a). XPRD curves of NS-PC, NS-H $\alpha$ , and API (b).
